# Supplementary material
Source: PubMed Central journal article supplement (PMC8766887)

# Supplemental Figure 1

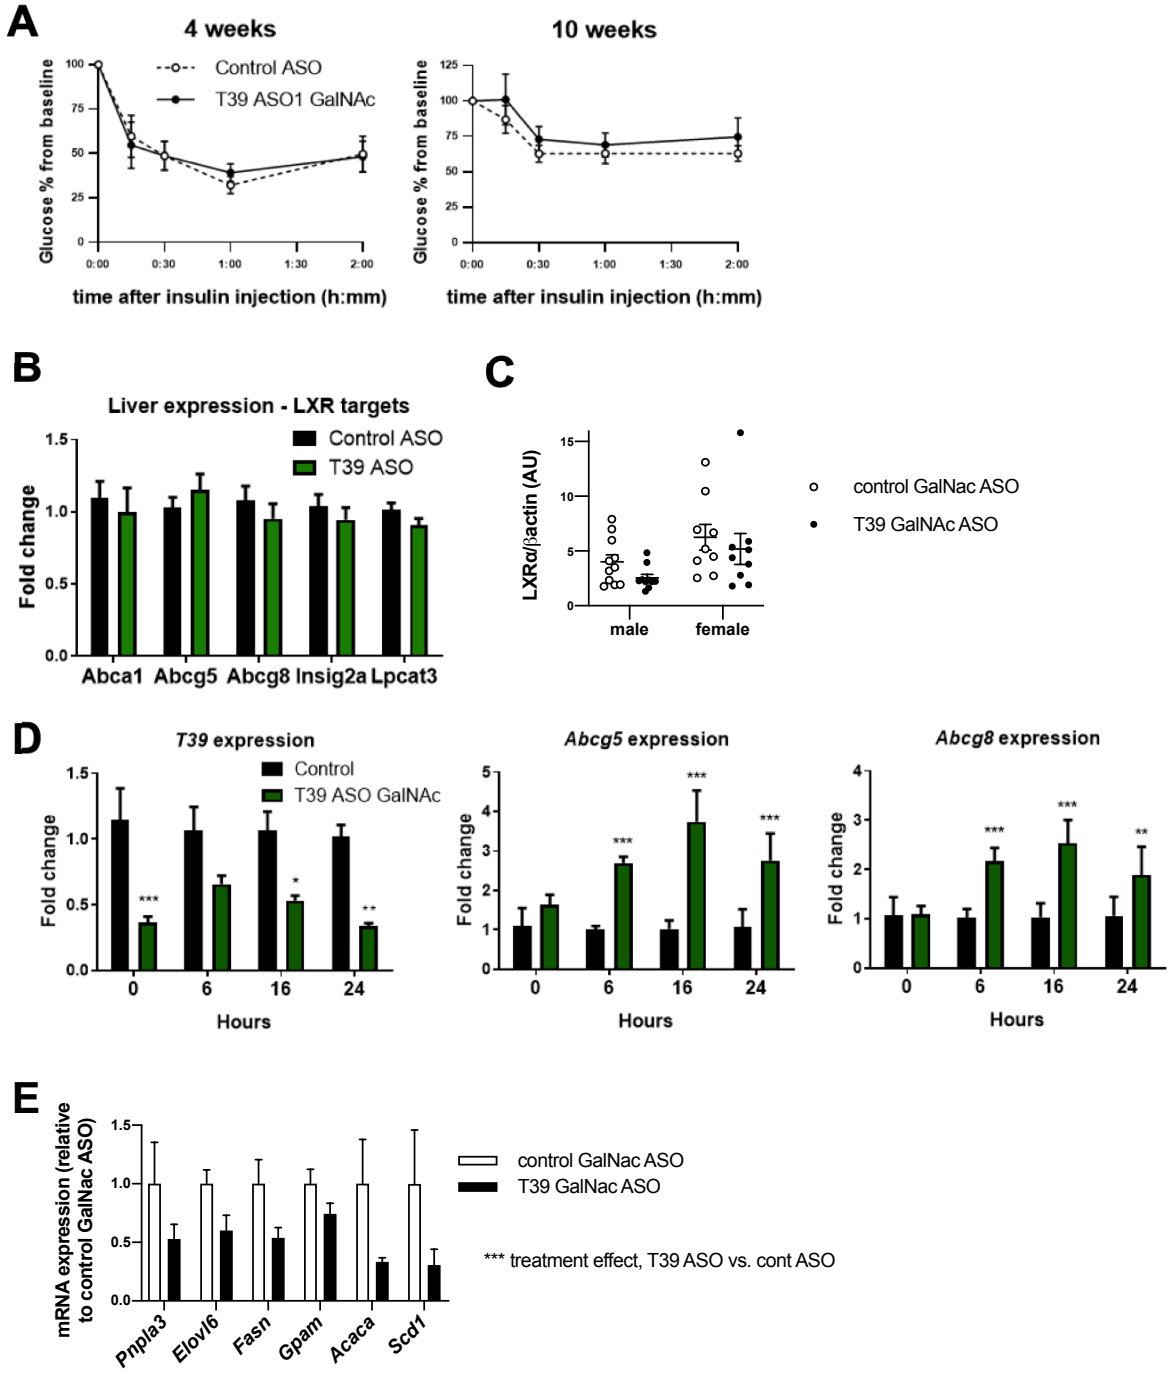

# Supplemental Figure 2

**A**

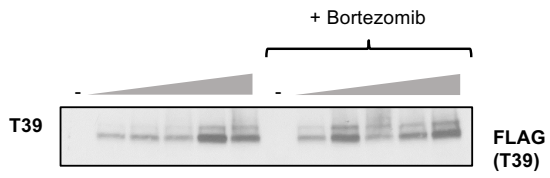

**B**

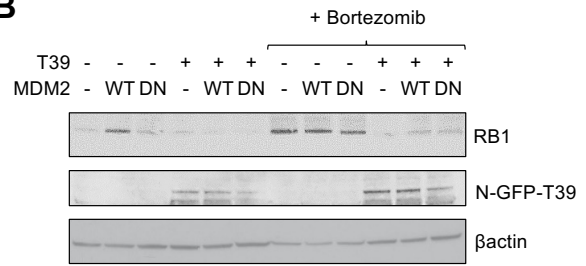

**C**

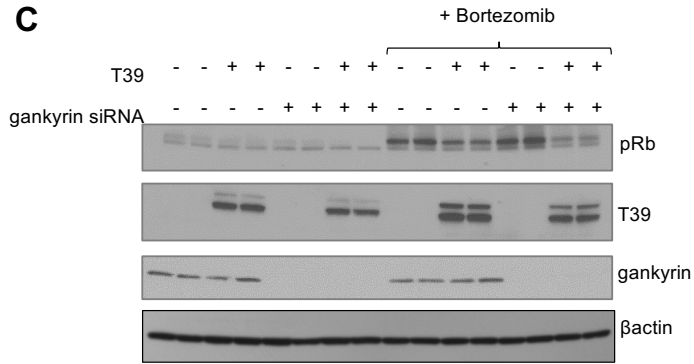

**D**

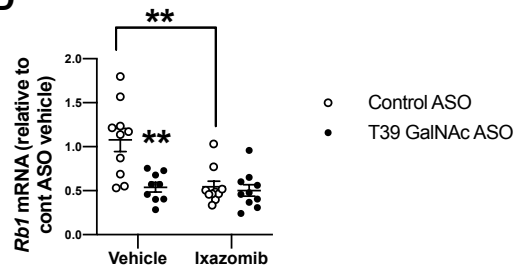

# Supplemental Figure 3

**A**

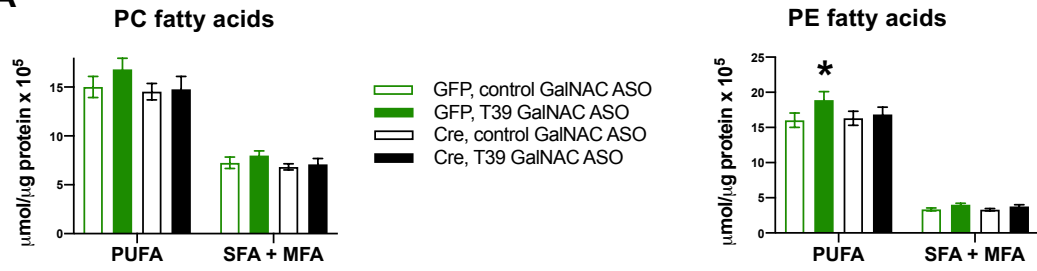

**B**

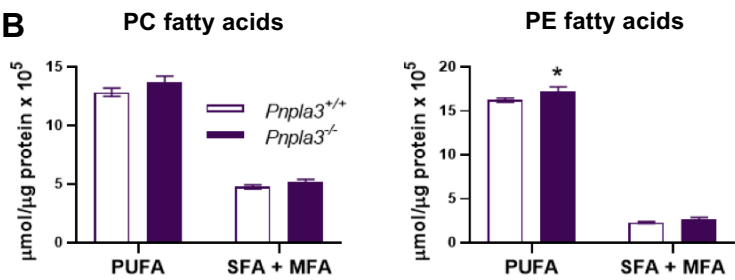

**C**

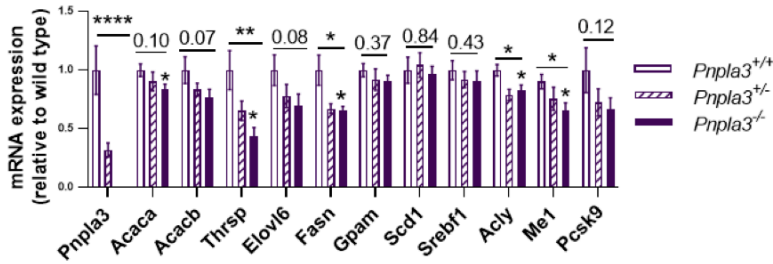

**D**

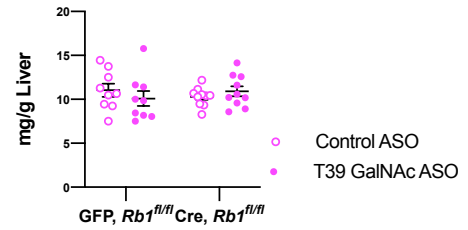

# Supplemental Figure 4

**A**

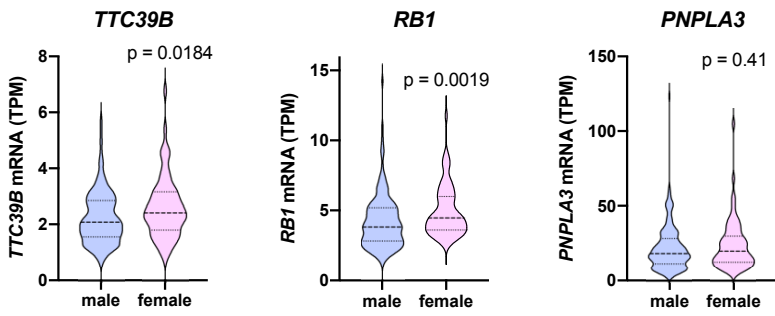

**B**

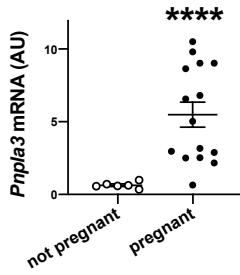

**C**

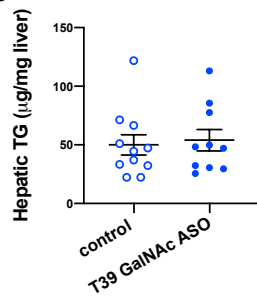

# Supplemental Figure 5

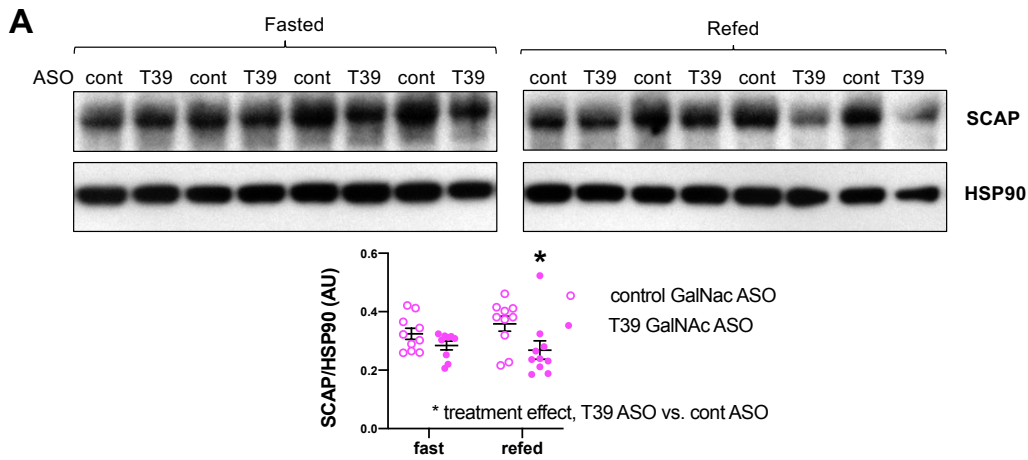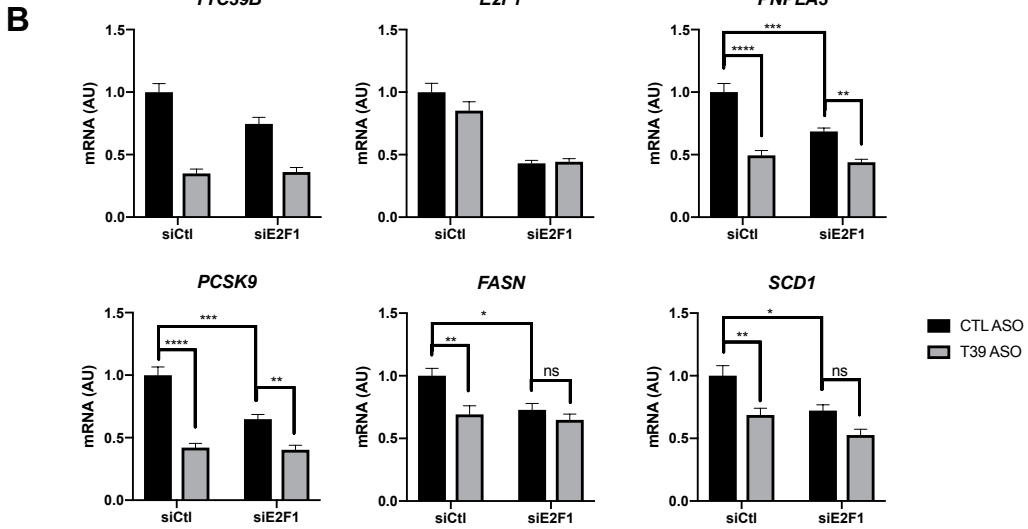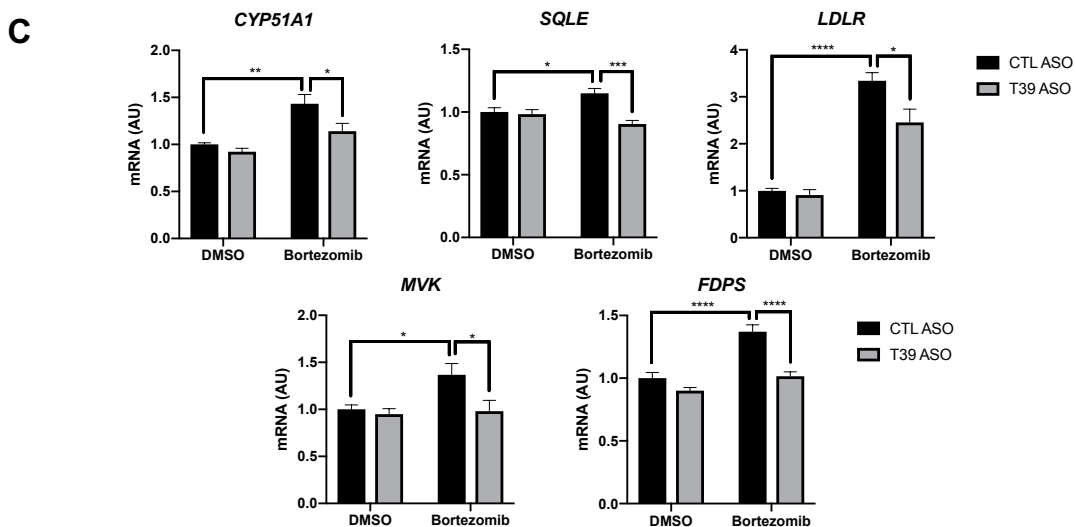

Supplement: NIHMS1744654-supplement-Supp_Figures.pdf [file NIHMS1744654-supplement-Supp_Figures.pdf]
